# Supplementary material for: Analysis of the Olive Fruit Fly Bactrocera oleae Transcriptome and Phylogenetic Classification of the Major Detoxification Gene Families
Source: PLoS One. 2013 Jun 18;8(6):e66533. doi: 10.1371/journal.pone.0066533 (PMC3688913; doi:10.1371/journal.pone.0066533)
Supplement: Table S5 — Sequence name, accession number, nucleotide and amino acid length and sequence, clade and clade identification method of B. oleae P450s obtained by degenerate PCR. (XLSX) [file pone.0066533.s009.xlsx]

## Sheet: Sheet1
Sequence name	Accesion number (GenBank)	length (bp)	Length (aa)	Nucleotide sequence	Protein sequence	Clade	Clade identification method
boCYP-01	KC917331	438	146	GTGATTACGTTTATGTTCGAAGGGCACGATACAACTTCTGCTGGTTCCAGCTTTGCGCTCTGCATGATGGGCATGCATAAAGATGTGCAAGAGAAGGTCTTAGCCGAGCAAAAGGCCATCTTTGGCGATAACTTCTTGCGTGACTGCACCTTTAACGATACCATGGAGATGAAATATTTGGAACGTGTCATTATGGAGACACTACGTATGTACCCACCAGTACCGTTGATTGCACGTCGCGTCGACAGCGATGTAAAATTGGCATCTGGTCCTTATGTTGTGCCAAAGGGCACTACTGTGGTCGTACTGCAATATCGCGTACACCGACGTCCCGACATTTATGCCAATCCTGACAAGTTCGATCCCGACAACTTCTTGCCCGAACGCATGGCCAAACGT…	VITFMFEGHDTTSAGSSFALCMMGMHKDVQEKVLAEQKAIFGDNFLRDCTFNDTMEMKYLERVIMETLRMYPPVPLIARRVDSDVKLASGPYVVPKGTTVVVLQYRVHRRPDIYANPDKFDPDNFLPERMAKRHYYSFIPFRRRPQ	CYP4	phylogenetic analysis
boCYP-05	KC917335	450	150	GCCCAGTGTTTGGTCTTTTTTTTTGCAGGCTTCGAGACTTCGTCGACTACCATGTCCTTCGCATTGTATGAACTAGCACAGCACGAAGATATACAACAGCGTGTGCGTGACGAAGTCATAGAAATTCTGGAGAAACACAAGGGCGAGTTCACTTATGACTGCATGAAGGAAATGGTCTATTTGGACCAAGTAATTTCCGAAACACTACGCCTCTATACTGTGGTTCCCGTGTTAAATCGTGAGTGCATGGAGGAGTATCCTGTGCCGGGTAACCCGAAATTTGTTATCGCTAAGGGTATGCAAGTTCTTATACCGTGTGCGGCATATCATCGTGATGCTGATATTTATCCCAACCCCGACACTTTCGATCCCGATAACTTTACACCCGAGAAGGTGGCC…	AQCLVFFFAGFETSSTTMSFALYELAQHEDIQQRVRDEVIEILEKHKGEFTYDCMKEMVYLDQVISETLRLYTVVPVLNRECMEEYPVPGNPKFVIAKGMQVLIPCAAYHRDADIYPNPDTFDPDNFTPEKVAQRDGVEWLPFGAGPSSC	CYP3	phylogenetic analysis
boCYP-10	KC917340	438	146	TTTCTGTTGGACGGGCTGGAGACGACTTCGACGACCATGACAAATTGTCTGTGGGAACTGGCAGTGAACGAGGACATACAAGAGCAAGTGCGCGAGGAAGTTGTACAGGCGATGCAGGAGCACGATGATGTGCTCACTTATGAGTGTCTCAAGCAAATGACCTACTTGGATCAGGTGCTCAAAGAAACCTTGCGAAAACATCCCATTGCGCCTGCATTGAAACGCGTTGCTTACGAAGACTATAAAGTACCTGGCACCAACTTTGTGATCAAAGCCAACACCACGGTGCTCATACCATCCGAAGCAATACAACACGATCCACGCTACTATCCAGATCCAGAGAAATTCGATCCGTTGCGTTTCACACCCGCAGCCATGGAGGAGCGACACCCGATGACA…	FLLDGLETTSTTMTNCLWELAVNEDIQEQVREEVVQAMQEHDDVLTYECLKQMTYLDQVLKETLRKHPIAPALKRVAYEDYKVPGTNFVIKANTTVLIPSEAIQHDPRYYPDPEKFDPLRFTPAAMEERHPMTFLPFSAGPRNCIG	CYP3	phylogenetic analysis
boCYP-14	KC917344	432	144	GTGATTATGGATATGCTAATGGCGGGAGTGGATCCGGCCTCCGCCACAGTTATTTCAATACTACACTTTCTTGGTCAAAACCCTGAAAAGCAGGAGGAACTGCGCAAAGAGCTGTTTGAGCTGCTGCCTGATCCAAAAATGCCATTAACTGATGAGAATACCAAAAATATGCCTTATTTGCGCGCTTGTATAAAAGAATCGCTACGTCTAAAGCCTATTGCCAATGGTAATTTCCGTCTTGCCGGTCGTGATATTGTGCTTTCCGGTTATAAGGTGCCTAAAGGTGTCGGTGTTTATATGGCTAATATGTCACTTTCCAATAGCGAAGAGTACTTCGAAAGAAGTGCAGAATTCTTGCCAGAACGTTGGATTAAGGCAACCAAAGCCACCTGCCCAGTC…	VIMDMLMAGVDPASATVISILHFLGQNPEKQEELRKELFELLPDPKMPLTDENTKNMPYLRACIKESLRLKPIANGNFRLAGRDIVLSGYKVPKGVGVYMANMSLSNSEEYFERSAEFLPERWIKATKATCPVAQKHNPFVYLP	mitochondrial	phylogenetic analysis
boCYP-15	KC917345	435	145	ATTATGGACTTGTTTAGGGCGGGGATGGAGACAATCAAAACTACTTTGCTCTGGATCAATGTATTTATGCTGCGCAACCCCGAAGCGATGCGACGCGTACAAGAAGAACTCGATCAGGTGGTCGGACGTCATCGTTTGCCTTCGATTGAGGATTTGCAATTTTTACCAGTGACCGAATCGACAATTTTGGAATCGATGCGTCGCTCTTCGATCGTGCCGCTCGCGACCACACACTCGCCAACAAGAGATGTTGAATTGAACGGTTACAAAATCCCCGCCGGCTCTCATGTCATACCGCTTATCAACAGCGTACATATGGACCCCAATTTGTGGGAGAAACCCGAAGAATTCAACCCACGTCGTTTCCTCGATTCCGAAGGCAAAGTGCGCAAATCCGAA…	IMDLFRAGMETIKTTLLWINVFMLRNPEAMRRVQEELDQVVGRHRLPSIEDLQFLPVTESTILESMRRSSIVPLATTHSPTRDVELNGYKIPAGSHVIPLINSVHMDPNLWEKPEEFNPRRFLDSEGKVRKSEYFIPFGVGHRSC	CYP2	phylogenetic analysis
